# Supplementary material
Source: MDPI journal article supplement (https://www.mdpi.com/2673-7655/2/3/16)
Supplement: s1 [file s1]

**Table S1. Origin of the diversity panel**

| Breeder                                       | Abbreviation         | Country | Number of lines |
|-----------------------------------------------|----------------------|---------|-----------------|
| UHOH, Landessaatzuchtanstalt (720)            | UHOH                 | DE      | 172             |
| HegeSaat GmbH & Co. KG                        | HegeSaat             | DE      | 135             |
| Nordsaat Saatzucht GmbH                       | Nordsaat             | DE      | 89              |
| DANKO Hodowla Roslin Sp. z o.o.               | DANKO                | PL      | 53              |
| Pflanzenzucht Oberlimpurg                     | POZ                  | DE      | 25              |
| Lantmännern SW Seed B.V.                      | Lantmännern          | SE      | 18              |
| Field Crop Development Centre (Canada)        | Canada               | CA      | 16              |
| DSP Delley semences et plantes SA             | DSP                  | CH      | 16              |
| RAGT 2n S.A.S.                                | RAGT                 | FR      | 16              |
| Hodowla Roslin Strzelce sp. z o.o. Grupa IHAR | Hodowla Roslin       | PL      | 13              |
| Saatzucht Streng-Engelen GmbH & Co. KG        | SZ Streng- Engelen   | DE      | 12              |
| Northern Seed LLC (USA)                       | Northern Seed        | US      | 12              |
| KWS LOCHOW GMBH                               | KWS LOCHOW           | DE      | 10              |
| Florimond Desprez Veuve & Fils S.A.S.         | Florimond            | FR      | 9               |
| Lemaire-Deffontaines S.A.                     | Lemaire-Deffontaines | FR      | 9               |
| Getreidezüchtung Peter Kunz                   | Kunz                 | CH      | 8               |
| P.H. PETERSEN SAATZUCHT GmbH                  | Petersen Saatzucht   | DE      | 7               |
| Agri Obtentions                               | Agri Obt.            | FR      | 7               |
| NARDI Fundulea (Romania)                      | NARDI                | RO      | 7               |
| Saatzucht Donau GesmbH. & CoKG                | SZ Donau             | AT      | 6               |
| Ghent University (Belgium)                    | Uni Ghent            | BE      | 5               |
| Saatzucht Josef Breun GmbH & Co. KG           | SZ Breun             | DE      | 3               |
| Sejet Planteforædling I/S                     | Sejet                | DK      | 2               |
| Deutsche Saatveredelung AG                    | DSV-Saaten           | DE      | 1               |
| Fr Strube Saatzucht GmbH & Co. KG             | Strube               | DE      | 1               |
| JKI                                           | JKI                  | DE      | 1               |
| SECOBRA Saatzucht GmbH                        | SECOBRA              | DE      | 1               |
| Caussade Semences S.A.                        | Caussade             | FR      | 1               |
| Russian Federation                            | Russian Fed.         | RU      | 1               |
| Sum                                           |                      |         | 656             |

**Table S2.** Characteristics of the experimental sites Bohlingen (BOH), Hohenheim (HOH), Oberer Lindenhof (OLI), and Pflanzenzüchtung Oberlimpurg (PZO) over a long term mean of 30 years from 1961-1990.

| Location | Latitude      | Longitude    | Altitude<br>(m) | Mean annual<br>precipitation<br>(mm) | Mean annual<br>temperature<br>(°C) |
|----------|---------------|--------------|-----------------|--------------------------------------|------------------------------------|
| BOH      | 47°43'31.4" N | 8°54'24.6" E | 400             | 805                                  | 9.0                                |
| HOH      | 48°42'52.9" N | 9°11'15.5" E | 400             | 691                                  | 8.5                                |
| OLI      | 48°28'27.6" N | 9°18'15.6" E | 707             | 805                                  | 6.8                                |
| PZO      | 49°12'10.5" N | 9°27'56.6" E | 244             | 841                                  | 9.1                                |

(Source: Agrarmeteorologie Baden-Württemberg)

**Table S3.** Race designation and virulence phenotype of German isolates used for field inoculations

| Pathogen<br>Race                                                  | Virulence                                                          |
|-------------------------------------------------------------------|--------------------------------------------------------------------|
| <b>Stem rust (<i>Puccinia graminis</i> f. sp. <i>tritici</i>)</b> |                                                                    |
| TKTTF                                                             | <i>Sr 5,6,7b,8a,9a,9b,9d,9e,9g,10,-,17,21,-,30,-,36,38,McN,Tmp</i> |
| TKPTF                                                             | <i>Sr 5,6,7b,8a,9a,-,9d,9e,9g,10,-,17,21,-,30,-,36,38,McN,Tmp</i>  |
| MMMTF                                                             | <i>Sr 5,-,7b,-,9a,-,9d,-,9g,10,11,17,-,-,-,36,38,McN,Tmp</i>       |
| MRRTF                                                             | <i>Sr 5,6,7b,-,9a,9b,9d,-,9g,10,11,17,-,-,-,36,38,McN,Tmp</i>      |
| MRMTF                                                             | <i>Sr 5,6,7b,-,9a,-,9d,-,9g,10,11,17,-,-,-,36,38,McN,Tmp</i>       |
| <b>Yellow rust (<i>Puccinia striiformis</i>)</b>                  |                                                                    |
| Warrior (PstS7)                                                   | <i>Yr 1,2,3,4,-,6,7,-,9,-,-,17,-,25,-,32,Sp,AvS,Amb</i>            |
| Kranich (PstS8)                                                   | <i>Yr 1,2,3,-,-,6,7,8,9,-,-,17,-,25,-,32,-,AvS,Amb</i>             |
| Warrior(-) (PstS10)                                               | <i>Yr 1,2,3,4,-,6,7,-,9,-,-,17,-,25,-,32,Sp,AvS,-</i>              |
| Triticale2015 (PstS13)                                            | <i>Yr -,2,-,-,6,7,8,9,-,-,-,-,-,AvS,-</i>                          |
